# Supplementary material for: Response of Soil Net Nitrogen Mineralization to a Litter in Three Subalpine Forests
Source: MDPI journal article supplement (doi:10.3390/f13040597), 2022-04-11
Supplement: s1 [file s1]

Table S1. Soil microbial biomass carbon (MBC) and microbial biomass nitrogen (MBN) in different litter treatment and sampling season of three forest types

|                     |     | MBC                           | MBN                         | MBC                            | MBN                         |
|---------------------|-----|-------------------------------|-----------------------------|--------------------------------|-----------------------------|
|                     |     | retain litter                 |                             | remove litter                  |                             |
| Coniferous forest   | FS  | 1022.97 ± 51.66 <sup>Aa</sup> | 56.58 ± 2.69 <sup>Aa</sup>  | 869.72 ± 41.83 <sup>Aa</sup>   | 65.65 ± 4.69 <sup>Aa</sup>  |
|                     | TS  | 194.26 ± 32.66 <sup>Aa</sup>  | 44.25 ± 3.38 <sup>Ab</sup>  | 289.94 ± 55.66 <sup>Aa</sup>   | 51.03 ± 6.42 <sup>Ab</sup>  |
|                     | EGS | 533.11 ± 66.35 <sup>Aa</sup>  | 23.88 ± 4.36 <sup>Ba</sup>  | 591.70 ± 55.59 <sup>Aa</sup>   | 27.88 ± 0.66 <sup>Aab</sup> |
|                     | LGS | 681.37 ± 78.13 <sup>Aa</sup>  | 20.50 ± 2.06 <sup>Aa</sup>  | 813.50 ± 85.65 <sup>Aa</sup>   | 17.07 ± 0.72 <sup>Aa</sup>  |
|                     | EFS | 752.79 ± 101.10 <sup>Aa</sup> | 5.88 ± 0.49 <sup>Aa</sup>   | 656.64 ± 80.53 <sup>Aa</sup>   | 4.63 ± 0.44 <sup>Aa</sup>   |
| Mixed forest        | FS  | 963.16 ± 158.28 <sup>Aa</sup> | 47.91 ± 5.62 <sup>Aa</sup>  | 960.98 ± 98.33 <sup>Aa</sup>   | 40.85 ± 8.10 <sup>Ab</sup>  |
|                     | TS  | 264.27 ± 39.20 <sup>Aa</sup>  | 63.35 ± 7.31 <sup>Aa</sup>  | 191.24 ± 42.43 <sup>Aa</sup>   | 61.79 ± 1.81 <sup>Ab</sup>  |
|                     | EGS | 432.93 ± 81.64 <sup>Aa</sup>  | 23.24 ± 4.24 <sup>Aa</sup>  | 455.78 ± 103.78 <sup>Aa</sup>  | 20.54 ± 4.03 <sup>Ab</sup>  |
|                     | LGS | 764.79 ± 137.76 <sup>Aa</sup> | 26.01 ± 6.21 <sup>Aa</sup>  | 788.05 ± 58.40 <sup>Aa</sup>   | 29.82 ± 4.43 <sup>Aa</sup>  |
|                     | EFS | 916.17 ± 145.56 <sup>Aa</sup> | 8.30 ± 2.33 <sup>Aa</sup>   | 744.38 ± 122.55 <sup>Aa</sup>  | 8.39 ± 2.30 <sup>Aa</sup>   |
| Broad-leaved forest | FS  | 1285.15 ± 94.67 <sup>Ba</sup> | 36.47 ± 11.11 <sup>Aa</sup> | 1569.29 ± 405.69 <sup>Aa</sup> | 21.78 ± 3.27 <sup>Ab</sup>  |
|                     | TS  | 221.62 ± 41.81 <sup>Aa</sup>  | 73.43 ± 4.95 <sup>Ba</sup>  | 299.06 ± 44.97 <sup>Aa</sup>   | 82.49 ± 5.13 <sup>Aa</sup>  |
|                     | EGS | 596.46 ± 83.67 <sup>Aa</sup>  | 31.52 ± 1.27 <sup>Aa</sup>  | 521.23 ± 22.01 <sup>Aa</sup>   | 31.22 ± 2.31 <sup>Aa</sup>  |
|                     | LGS | 661.73 ± 444.98 <sup>Aa</sup> | 23.82 ± 2.34 <sup>Aa</sup>  | 635.91 ± 102.77 <sup>Aa</sup>  | 16.45 ± 1.04 <sup>Aa</sup>  |
|                     | EFS | 775.74 ± 110.42 <sup>Aa</sup> | 8.02 ± 1.27 <sup>Aa</sup>   | 820.63 ± 210.53 <sup>Aa</sup>  | 9.70 ± 1.04 <sup>Aa</sup>   |

Lowercase letters represent significant differences among different sampling seasons in the same litter treatment and forest type. Uppercase letters represent significant differences between different litter treatments in the same sampling season and forest type.

Table S2. Soil C:N, C:P, and N:P ratio in different sampling season of three forest types

|                     |     | C:N                        | C:P                        | N:P                      | C:N                       | C:P                        | N:P                      |
|---------------------|-----|----------------------------|----------------------------|--------------------------|---------------------------|----------------------------|--------------------------|
|                     |     | retain litter              |                            |                          | remove litter             |                            |                          |
| Coniferous forest   | FS  | 15.34 ± 0.66 <sup>ab</sup> | 54.56 ± 3.38 <sup>b</sup>  | 3.59 ± 0.38 <sup>a</sup> | 16.43 ± 0.62 <sup>a</sup> | 52.96 ± 3.33 <sup>a</sup>  | 3.22 ± 0.08 <sup>a</sup> |
|                     | TS  | 15.29 ± 0.59 <sup>ab</sup> | 48.20 ± 4.07 <sup>b</sup>  | 3.18 ± 0.37 <sup>a</sup> | 18.05 ± 1.10 <sup>a</sup> | 57.32 ± 4.74 <sup>a</sup>  | 3.17 ± 0.10 <sup>a</sup> |
|                     | EGS | 19.77 ± 1.98 <sup>a</sup>  | 75.32 ± 3.73 <sup>a</sup>  | 3.90 ± 0.50 <sup>a</sup> | 19.40 ± 2.56 <sup>a</sup> | 77.64 ± 11.05 <sup>a</sup> | 4.13 ± 0.74 <sup>a</sup> |
|                     | LGS | 12.80 ± 1.09 <sup>b</sup>  | 49.13 ± 1.49 <sup>b</sup>  | 3.92 ± 0.46 <sup>a</sup> | 17.77 ± 0.51 <sup>a</sup> | 62.85 ± 5.94 <sup>a</sup>  | 3.53 ± 0.30 <sup>a</sup> |
|                     | EFS | 11.67 ± 0.83 <sup>b</sup>  | 48.33 ± 3.11 <sup>b</sup>  | 4.21 ± 0.51 <sup>a</sup> | 17.79 ± 1.56 <sup>a</sup> | 69.01 ± 3.78 <sup>a</sup>  | 3.94 ± 0.41 <sup>a</sup> |
| Mixed forest        | FS  | 16.80 ± 1.47 <sup>a</sup>  | 47.24 ± 1.38 <sup>a</sup>  | 2.87 ± 0.32 <sup>a</sup> | 19.37 ± 2.53 <sup>a</sup> | 51.54 ± 1.61 <sup>a</sup>  | 2.72 ± 0.24 <sup>a</sup> |
|                     | TS  | 14.08 ± 0.51 <sup>a</sup>  | 41.47 ± 0.44 <sup>a</sup>  | 2.95 ± 0.11 <sup>a</sup> | 17.31 ± 1.39 <sup>a</sup> | 58.73 ± 2.44 <sup>a</sup>  | 3.44 ± 0.34 <sup>a</sup> |
|                     | EGS | 11.99 ± 2.56 <sup>a</sup>  | 43.50 ± 1.30 <sup>a</sup>  | 3.97 ± 0.80 <sup>a</sup> | 15.39 ± 1.03 <sup>a</sup> | 57.61 ± 6.93 <sup>a</sup>  | 3.82 ± 0.63 <sup>a</sup> |
|                     | LGS | 16.74 ± 0.56 <sup>a</sup>  | 54.59 ± 4.06 <sup>a</sup>  | 3.26 ± 0.20 <sup>a</sup> | 15.29 ± 0.41 <sup>a</sup> | 58.91 ± 6.77 <sup>a</sup>  | 3.85 ± 0.41 <sup>a</sup> |
|                     | EFS | 13.60 ± 0.73 <sup>a</sup>  | 68.38 ± 11.21 <sup>a</sup> | 5.00 ± 0.73 <sup>a</sup> | 14.85 ± 1.91 <sup>a</sup> | 55.54 ± 3.57 <sup>a</sup>  | 3.82 ± 0.35 <sup>a</sup> |
| Broad-leaved forest | FS  | 10.69 ± 1.14 <sup>ab</sup> | 38.23 ± 2.35 <sup>b</sup>  | 3.67 ± 0.51 <sup>a</sup> | 10.63 ± 0.34 <sup>b</sup> | 37.17 ± 0.85 <sup>b</sup>  | 3.50 ± 0.08 <sup>b</sup> |
|                     | TS  | 14.99 ± 0.79 <sup>a</sup>  | 43.02 ± 2.89 <sup>ab</sup> | 2.87 ± 0.08 <sup>a</sup> | 11.12 ± 1.27 <sup>b</sup> | 34.76 ± 1.35 <sup>b</sup>  | 3.19 ± 0.29 <sup>b</sup> |
|                     | EGS | 8.66 ± 1.27 <sup>b</sup>   | 55.82 ± 3.55 <sup>a</sup>  | 6.64 ± 0.68 <sup>a</sup> | 7.41 ± 1.35 <sup>b</sup>  | 46.36 ± 2.82 <sup>b</sup>  | 6.56 ± 0.92 <sup>a</sup> |
|                     | LGS | 12.46 ± 1.05 <sup>ab</sup> | 43.49 ± 3.78 <sup>ab</sup> | 3.49 ± 0.10 <sup>a</sup> | 17.75 ± 0.94 <sup>a</sup> | 59.49 ± 2.72 <sup>a</sup>  | 3.36 ± 0.11 <sup>b</sup> |
|                     | EFS | 10.58 ± 0.22 <sup>ab</sup> | 46.00 ± 2.15 <sup>ab</sup> | 4.35 ± 0.17 <sup>a</sup> | 12.65 ± 0.15 <sup>b</sup> | 49.72 ± 4.24 <sup>b</sup>  | 3.94 ± 0.38 <sup>b</sup> |

Lowercase letters represent significant differences among different sampling seasons in the same litter treatment and same forest type.

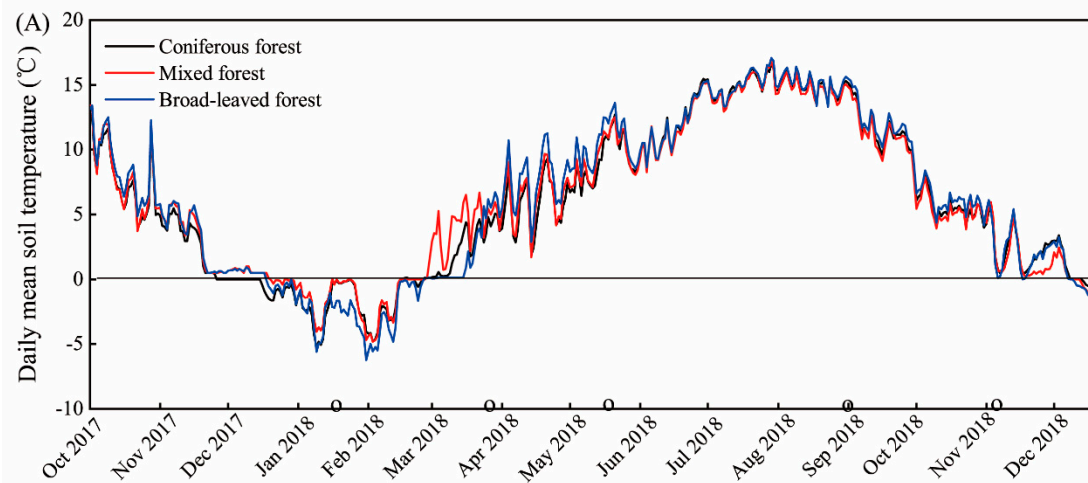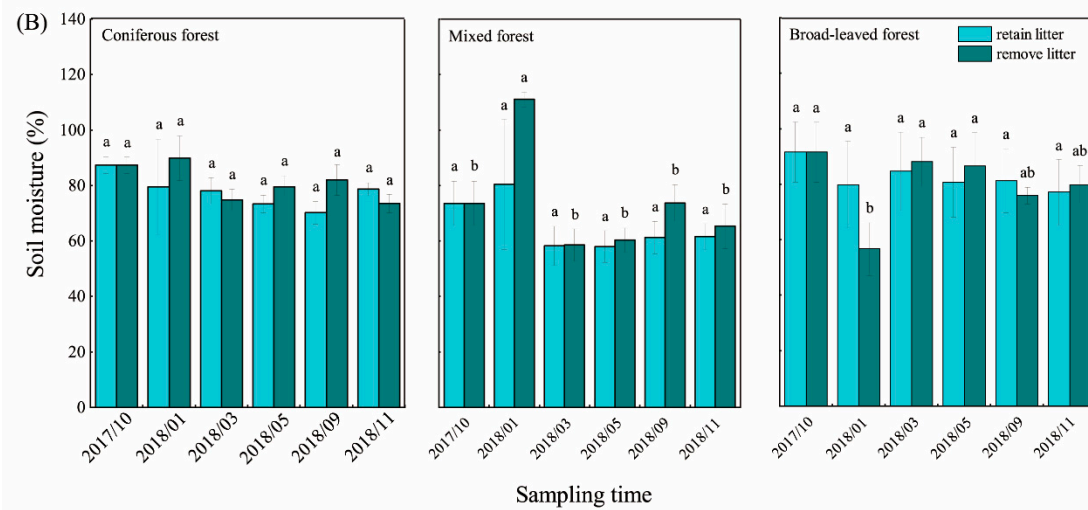

**Figure S1.** Soil temperature from Oct 2017 to Dec 2018 (A) and soil moisture was affected by litter treatment at different times in three forests (B). The circles indicate the sampling season. Values indicate means  $\pm$  standard error,  $n = 3$ . The asterisks represent the significant differences between different litter treatments in the same sampling season. Lowercase letters represent significant differences among different sampling seasons in the same litter treatment.
